# Supplementary material for: Setd1b, encoding a histone 3 lysine 4 methyltransferase, is a maternal effect gene required for the oogenic gene expression program
Source: Oxford University Press journal article supplement (doi:10.1242/dev.143347), 2017-06-16
Supplement: dev143347supp.pdf [file dev143347supp.pdf]

Figure S1

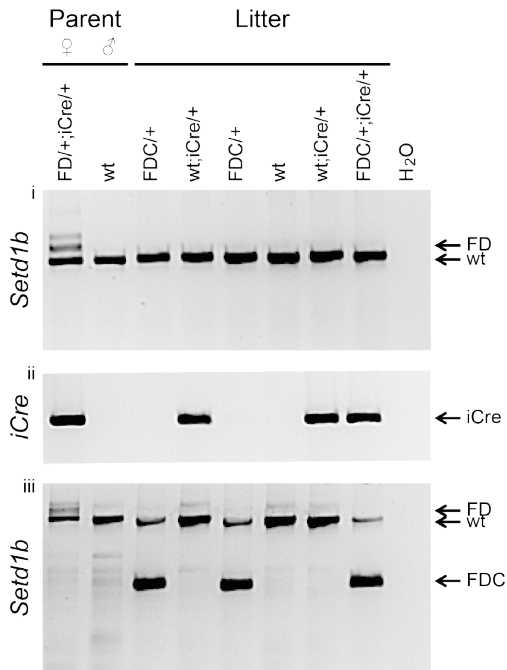

**Figure S1. Recombination of the *Setd1b* conditional allele using *Gdf9iCre* as a deleter strain.** Female mice of the genotype *Setd1b*<sup>FD/+;Gdf9iCre/+</sup> (control) were crossed to C57/BL6 males and the offspring were genotyped from tail biopsies. (i) The genotype of the *Setd1b*<sup>FD</sup> allele was identified with primers flanking the downstream loxP site. The wild type band is 507 bp and the FD band is 696 bp. (ii) Genotyping for iCre. The expected size of the PCR product is 230 bp. Despite the Cre-negative genotype of pup 1 and 3, they display the recombined allele, possibly due to diffusion of Cre protein. (iii) The recombined *Setd1b*<sup>FDC</sup> allele was identified by PCR with primers upstream of the 5' FRT site and downstream of the 3' loxP site to generate the FD band at 1695 bp. The wild type band is 1305 bp and the FDC band is 390 bp.

Figure S2

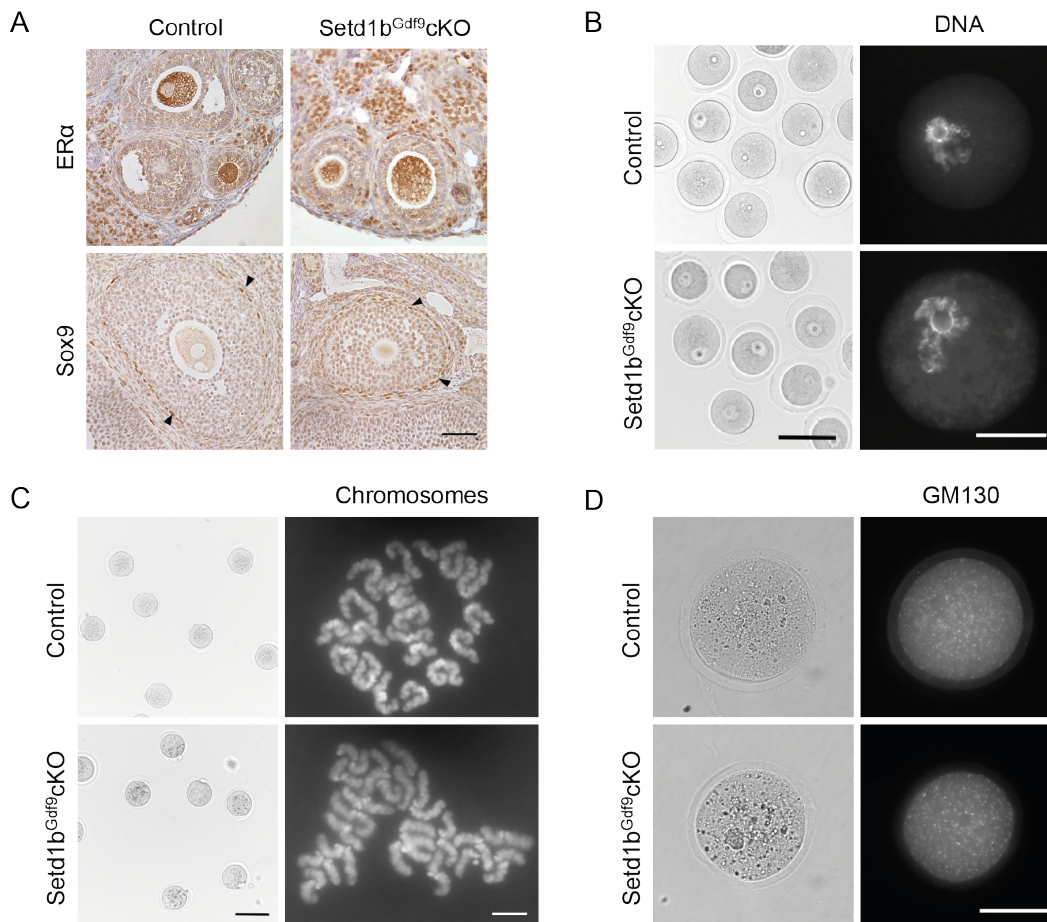

**Figure S2. Ovarian marker molecules, MII oocyte chromosome number, Golgi complex distribution and periovulatory chromatin rearrangement are normal.** (A) Ovarian morphology and germ cell development assessed by immunohistochemistry with antibodies against ERα and Sox9. 23 week old mice were sacrificed, ovaries fixed, paraffin embedded and further processed for immunohistochemistry with antibodies against ERα and Sox9. Scale bar: 50 μm. ERα is expressed in the oocyte and in stromal cells of the ovary. Sox9 is predominantly expressed in theca cells and to a lesser extent in granulosa cells and oocytes. Both ovaries of control and *Setd1b<sup>Gdf9</sup>cKO* mice displayed comparable expression of these markers. (B) Periovulatory oocytes display a surrounded nucleolus. DIC (left) and fluorescence microscopy (right) analysis of periovulatory oocytes stained with DAPI to visualize DNA. A total of 70 oocytes of both genotypes were analysed in four independent experiments. Scale bar for DIC images: 100 μm, scale bar for fluorescence images: 50 μm. (C) Metaphase II chromosomes. Chromosome spreads were prepared using MII oocytes from control and *Setd1b<sup>Gdf9</sup>cKO* mice. A total of 134 (control) and 105 (*Setd1b<sup>Gdf9</sup>cKO*) MII oocytes were evaluated in three independent experiments. Chromosomes with two chromatids are shown. Scale bar for DIC images: 100 μm, scale bar for fluorescent images: 10 μm. (D) Golgi complex distribution in MII oocytes. DIC (left) and fluorescence microscopy (right) analysis of MII oocytes stained with GM130 to visualize Golgi complexes. A total of 45 (control) and 28 (*Setd1b<sup>Gdf9</sup>cKO*) oocytes were evaluated. Scale bar: 50 μm.

Figure S3

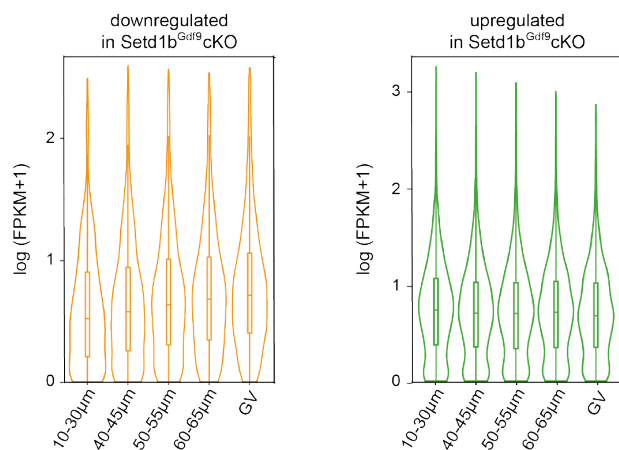

**Figure S3. Violin plot representation of absolute expression levels of genes down- and up-regulated in *Setd1b<sup>Gdf9</sup>*cKO during oocyte growth in wild-type oocytes.** Shape of the plot shows Kernel density estimation, i.e., the probability density of the data at the different values. Horizontal lines correspond to the median, boxes represent the interquartile range and vertical lines adjacent values, i.e., the minimum and maximum values in the data within the 1.5 x interquartile range distance from the value of the first and third quartile, respectively.

**A**

Expression relative to *Rpl19* (%)

control Setd1b<sup>Gdf9</sup>cKO

Obox1 Obox5

**B**

Expression relative to *Rpl19* (%)

Dppa5a Nobox

**C**

Mitochondrion

Setd1b<sup>Gdf9</sup>cKO control

**D**

Expression relative to *Rpl19* (%)

Sdhc Sdhb Ndufs2 Cox7b

**E**

Ribosome

Setd1b<sup>Gdf9</sup>cKO control

**F**

**Figure S4. Oocyte-specific deletion of *Setd1b* influences the expression of mitochondrial genes.** (A and B) To validate the RNA-seq results, quantitative RT–PCR was performed on control and *Setd1b*<sup>Gdf9</sup> cKO MII oocytes for selected genes essential for oocyte regulatory pathways. Relative quantities of mRNA were normalized against *Rpl19*. (C) Gene set enrichment analysis (GSEA) heatmap of control versus *Setd1b*<sup>Gdf9</sup> cKO oocytes for the term mitochondrion. (D) To validate the RNA-seq results, quantitative RT–PCR was performed on control and *Setd1b*<sup>Gdf9</sup> cKO MII oocytes for selected genes essential for oxidative phosphorylation. Relative quantities of mRNA were normalized against *Rpl19*. Mean + SD is shown; n = 3. Statistical significance was tested using the unpaired t test with Welch’s correction: \*, p < 0.05; \*\*, p < 0.01; \*\*\*, p < 0.001. (E and F) Gene set enrichment analysis (GSEA) heatmaps of control versus *Setd1b*<sup>Gdf9</sup> cKO oocytes for genes responsible for ribosome biogenesis and purine metabolism.

Figure S5

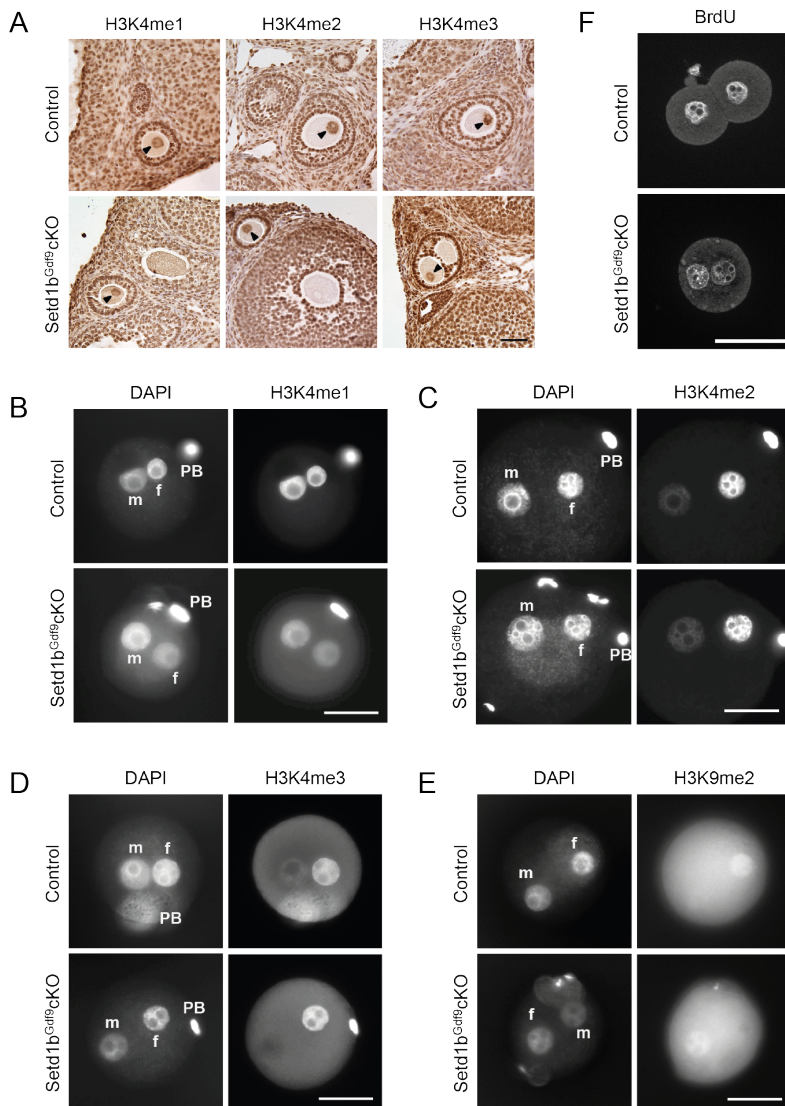

**Figure S5. *Setd1b<sup>Gdf9</sup>cKO* oocytes and zygotes show no defect in bulk H3K4 methylation.** (A) Control and *Setd1b<sup>Gdf9</sup>cKO* ovaries were sectioned and stained with antibodies against H3K4 mono-, di- and trimethylation as indicated. Arrowheads denote the oocyte nucleus. Scale bar: 50  $\mu$ m. Representative micrographs showing fluorescence microscopy analysis of H3K4me1 (B) H3K4me2 (C) H3K4me3 (D) and H3K9me2 (E). The female pronucleus (f) displays a comparable level of H3K4me1, H3K4me2 and H3K4me3. The male pronucleus (m) is negative for H3K4me2, H3K4me3 and H3K9me2. Polar bodies (PB) stain with all antibodies used. Note in C the presence of multiple sperm heads (hook-shaped structures in the perivitelline space). A total of 30 (control) and 37 (*Setd1b<sup>Gdf9</sup>cKO*) zygotes were evaluated for H3K4me1. A total of 72 (control) and 65 (*Setd1b<sup>Gdf9</sup>cKO*) zygotes were evaluated in two independent experiments for H3K4me2. A total of 94 (control) and 28 (*Setd1b<sup>Gdf9</sup>cKO*) zygotes were evaluated in two independent experiments for H3K4me3. A total of 54 (control) and 52 (*Setd1b<sup>Gdf9</sup>cKO*) zygotes were evaluated in two independent experiments for H3K9me2. Scale bars: 50  $\mu$ m. (F) Representative images showing BrdU labeling. Zygotes were incubated with BrdU until 44 h post-hCG. A total of 56 (control) and 40 (*Setd1b<sup>Gdf9</sup>cKO*) zygotes were evaluated in two independent experiments. Scale bar: 50  $\mu$ m.



Figure S6

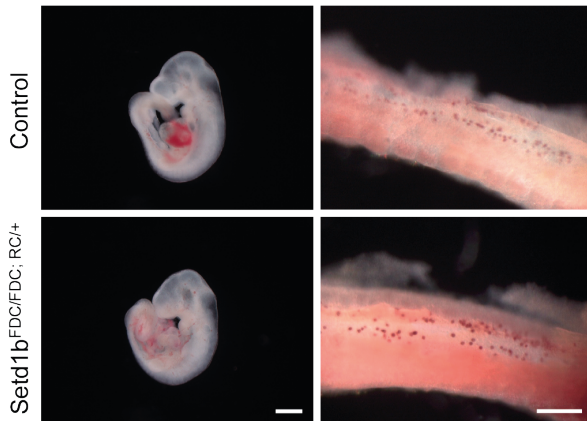

**Figure S6. Setd1b does not control germ cell number.** *Setd1bFD/FD;RC/+* and *Setd1bFD/+;RC/+* embryos induced with tamoxifen at E6.5 were dissected at E10.5. Scale bar: 1 mm. Genital ridges of females were stained for alkaline phosphatase expression. Scale bar: 200  $\mu$ m.

Table S1. Primers for genotyping and qRT-PCR

| Primer pairs                   | Sequence (5'-3')            | Product size (bp)     |
|--------------------------------|-----------------------------|-----------------------|
| Genotyping of Setd1bD allele   |                             |                       |
| Setd1b_ex5                     | GAAACTCGCATGCGCTTCTAC       | 507 [wt];             |
| Setd1b_loxP2                   | AGTTCATACTGTGGCTGAATGG      | 696 [FD]              |
| Genotyping of Setd1bFDC allele |                             |                       |
| Setd1b_flp                     | GGGTGGAGAGGGAAAGAAAAG       | 1305 [wt]; 1695 [FD]; |
| Setd1b_loxP2                   | AGTTCATACTGTGGCTGAATGG      | 390 [FDC]             |
| Genotyping of iCre             |                             |                       |
| iCre                           | AACCTGAGGATGTGAGGGACTA      | 230                   |
|                                | GTCAAAGTCAGTGC GTTCAAAG     |                       |
| Genotyping of Cre              |                             |                       |
| Cre                            | GCCTGCATTACCGGTCGATGCAACGA  | 700                   |
|                                | GTGGCAGATGGCGCGGCAACACCATT  |                       |
| sex-specific PCR               |                             |                       |
| Ube1x                          | TGGTCTGGACCCAAACGCTGTCCACA  | 198+217 ♂             |
|                                | GGCAGCAGCCATCACATAATCCAGATG | 217 ♀                 |
| qRT-PCR                        |                             |                       |
| Rpl19                          | CTGATCAAGGATGGGCTGATC       | 147                   |
|                                | CTTCTCAGGCATCCGAGCATT       |                       |
| Setd1b                         | CTGTTGGTGAGCTGGATGCTA       | 172                   |
|                                | CTGGAGTAAGCTGTGTCTTGG       |                       |
| Sdhc                           | GTCTCTCTTTTTGGCCTGTCG       | 194                   |
|                                | GGTATTGCCAGGCCTTTTCCT       |                       |
| Sdhd                           | CTGGGTACTTGAATCCCTGCT       | 194                   |
|                                | AGGTCAAAGCTGAGAGTGCCA       |                       |
| Ndufs2                         | CGTTTACGACCAGGTGGAGTT       | 166                   |
|                                | GGACACTTTGGCGTCATCAAC       |                       |
| Cox7b                          | GCATTCAAGCAAGTGGTGGCAA      | 203                   |
|                                | GCACGACTACTGATCTCTCCA       |                       |
| Dppa5a                         | TGGATGCTTCAGTCCATGGCT       | 125                   |
|                                | AGGACTGGAAACTGGCTTCAC       |                       |
| Obox1                          | GCTGGCACTATCAGTTGGTGT       | 126                   |
|                                | GAGCTTCCATTTGACTCTGGC       |                       |
| Obox5                          | GCTGGCAGTATCAGTTGGTGT       | 151                   |
|                                | ATGGGTTGACTCAGAAACCGC       |                       |
| Nobox                          | CAGTGGAGACTCATCACAGGA       | 271                   |
|                                | CTCTACTCTAGTGCCTTCGAG       |                       |

Table S2. Primary antibodies

| Antibodies                         | Source         | Identifier     | Dilution     |
|------------------------------------|----------------|----------------|--------------|
| Rabbit anti-Ki67                   | Leica          | NCL Ki67-p     | 1:2200 IHC   |
| Rabbit anti-Sox9                   | Millipore      | AB5535         | 1:3000 IHC   |
| Rabbit anti-Ddx4                   | Abcam          | ab13840        | 1:1000 IHC   |
| Rat anti-Zp2                       | Santa Cruz     | sc-32752       | 1:100 IHC/IF |
| Rabbit anti-ER $\alpha$            | Santa Cruz     | sc-543         | 1:250 IHC    |
| Rabbit anti-H3K4me1                | Diagenode      | C15410037      | 1:1000 IHC   |
|                                    |                | lot A1657D     | 1:100 IF     |
| Rabbit anti-H3K4me2                | Diagenode      | pAb-035-050    | 1:1000 IHC   |
|                                    |                | lot 936-0014P  | 1:100 IF     |
| Rabbit anti-H3K4me3                | Abcam          | ab8580         | 1:500 IHC    |
|                                    |                | lot GR188707-1 | 1:50 IF      |
| Rabbit anti-H3K9me2                | Millipore      | 07-441         | 1:150        |
| Mouse anti-GM130                   | BD Biosciences | 610822         | 1:200 IF     |
| Rabbit anti-Tomm20                 | Biorbyt        | orb128858      | 1:100 IF     |
| Mouse anti- $\alpha$ -tubulin FITC | Sigma-Aldrich  | F2168          | 1:40 IF      |
| Rat anti-BrdU FITC                 | Abcam          | ab74545        | 1:50 IF      |

Table S3

[Click here to Download Table S3](#)

Table S4

[Click here to Download Table S4](#)

Table S5

[Click here to Download Table S5](#)
